# Supplementary material
Source: PubMed Central journal article supplement (PMC8357030)
Supplement: NIHMS1728725-supplement-1.pdf [file NIHMS1728725-supplement-1.pdf]

Supplementary Table 1. Odds of being cognitively resilient to intermediate or high AD pathology versus not using inverse probability weights to account for selection bias into the autopsy sample\*

|                                   | Inverse probability weighted<br>demographic and non-AD<br>neuropathology adjusted<br>OR (95%CI) |
|-----------------------------------|-------------------------------------------------------------------------------------------------|
| College degree                    |                                                                                                 |
| Yes                               | 2.13 (1.04-4.35)                                                                                |
| CERAD                             |                                                                                                 |
| Frequent                          | 0.75 (0.36-1.55)                                                                                |
| Braak                             |                                                                                                 |
| IV                                | 0.41 (0.11-1.47)                                                                                |
| V                                 | 0.28 (0.09-0.89)                                                                                |
| VI                                | 0.07 (0.02-0.23)                                                                                |
| Cortical or deep<br>microinfarcts |                                                                                                 |
| 2+                                | 0.38 (0.15-0.95)                                                                                |
| Hippocampal sclerosis             |                                                                                                 |
| Yes                               | 0.20 (0.06-0.67)                                                                                |
| Lewy bodies in isocortex          |                                                                                                 |
| Yes                               | 0.28 (0.07-1.03)                                                                                |
| Brain weight (per gm)             | 1.004 (1.001-1.007)                                                                             |

\*Inverse probability weights generated from a selection model predicting the probability of being autopsied among those that died based on age at death, age at baseline, dementia status, gender, education, race, and ACT cohort

Supplementary table 2. Baseline characteristics of people with and without cognitive resilience to AD pathology; sensitivity analysis limiting cognitive resilience group to people with CASI scores  $\geq 86$  within one year before death

|                                               | Intermediate or high AD pathology |                       |         |
|-----------------------------------------------|-----------------------------------|-----------------------|---------|
|                                               | Not resilient                     | Cognitively Resilient | p-value |
|                                               | N (%‡)                            | N (%‡)                | (chi2)  |
|                                               | N=208*                            | N=32†                 |         |
| ACT cohort:                                   |                                   |                       | 0.08    |
| Original                                      | 139 (66.8)                        | 59 (81.3)             |         |
| Expansion                                     | 49 (23.6)                         | 2 (6.3)               |         |
| Replacement                                   | 20 (9.6)                          | 4 (12.5)              |         |
| Baseline median age (IQR)                     | 77 (73-82)                        | 78 (73-85)            | 0.88    |
| Median years between baseline and death (IQR) | 13 (9-16)                         | 9 (6-14)              | 0.09    |
| Sex:                                          |                                   |                       |         |
| Male                                          | 75 (36.1)                         | 10 (31.5)             | 0.60    |
| Female                                        | 133 (63.9)                        | 22 (68.8)             |         |
| Median years of education (IQR)               | 14 (12-16)                        | 15 (12-17)            | 0.36    |
| College degree:                               |                                   |                       |         |
| No                                            | 141 (67.8)                        | 17 (53.1)             | 0.10    |
| Yes                                           | 67 (32.2)                         | 15 (46.9)             |         |
| Race:                                         |                                   |                       |         |
| Non-Hispanic white                            | 196 (94.2)                        | 31 (96.9)             | 0.54    |
| Non-white                                     | 12 (5.8)                          | 1 (3.1)               |         |
| Hypertension                                  | 71 (34.5)                         | 11 (34.4)             | 0.99    |
| Diabetes                                      | 19 (9.1)                          | 2 (6.3)               | 0.59    |

|                                                |                  |                  |      |
|------------------------------------------------|------------------|------------------|------|
| Stroke                                         | 4 (1.9)          | 1 (3.1)          | 0.66 |
| Cerebrovascular disease                        | 19 (9.2)         | 3 (9.4)          | 0.98 |
| Coronary heart disease                         | 32 (15.5)        | 3 (9.4)          | 0.37 |
| Congestive heart failure                       | 2 (1.0)          | 0 (0)            | 0.58 |
| Smoking:                                       |                  |                  |      |
| Never                                          | 113 (54.3)       | 14 (43.8)        | 0.52 |
| Past                                           | 86 (41.4)        | 16 (50.0)        |      |
| Current                                        | 9 (4.3)          | 2 (6.3)          |      |
| BMI (kg/m <sup>2</sup> )                       |                  |                  |      |
| <25                                            | 84 (41.0)        | 13 (41.9)        | 0.89 |
| 25-29.9                                        | 81 (39.5)        | 11 (35.5)        |      |
| 30+                                            | 40 (19.5)        | 7 (22.6)         |      |
| Median head circumference cm (IQR)             | 56.2 (55.0-58.0) | 56.3 (55.2-57.9) | 0.80 |
| Regular exercise ( $\geq 15$ min 3x week)      | 151 (73.0)       | 25 (78.1)        | 0.54 |
| Number of difficult activities of daily living |                  |                  |      |
| 0                                              | 159 (76.8)       | 23 (71.9)        | 0.77 |
| 1                                              | 29 (14.0)        | 6 (18.8)         |      |
| 2+                                             | 19 (9.2)         | 3 (9.4)          |      |
| APOE $\epsilon 4$ allele                       | 79 (39.3)        | 10 (31.3)        | 0.38 |

\*People diagnosed with dementia before death, and a CERAD score of intermediate or frequent AND a BRAAK stage of III-VI

\*\*People diagnosed with dementia before death, and a CERAD score of frequent AND a BRAAK stage of V-VI

†People with a CASI score  $\geq 86$  within 1 year of death and no dementia diagnosis, and a CERAD score of intermediate or frequent AND a BRAAK stage of III-VI

‡Percent calculated among people with non-missing covariate data.

Supplementary table 3. Neuropathology characteristics of people with and without cognitive resilience to AD pathology; sensitivity analysis limiting resilience group to people with CASI scores  $\geq 86$  within one year before death

|                                                                | Intermediate or high AD pathology |                       |         |
|----------------------------------------------------------------|-----------------------------------|-----------------------|---------|
|                                                                | Not resilient                     | Cognitively Resilient | p-value |
|                                                                | N (%‡)                            | N (%‡)                | (chi2)  |
|                                                                | N=208*                            | N=32†                 |         |
| Median age at death (IQR)                                      | 91 (88-95)                        | 89 (85-93)            | 0.26    |
| Median years between dementia diagnosis and death (IQR)        | 5.2 (3.2-7.5)                     | N/A                   | N/A     |
| Median years between last CASI score $\geq 86$ and death (IQR) | N/A                               | 0.5 (0.2-0.6)         | N/A     |
| CERAD                                                          |                                   |                       |         |
| Intermediate                                                   | 75 (36.1)                         | 18 (56.3)             | 0.03    |
| Frequent                                                       | 133 (64.0)                        | 14 (43.8)             |         |
| Braak                                                          |                                   |                       |         |
| III                                                            | 17 (8.2)                          | 15 (46.9)             | <0.001  |
| IV                                                             | 27 (13.0)                         | 3 (9.4)               |         |
| V                                                              | 76 (36.5)                         | 8 (25.0)              |         |
| VI                                                             | 88 (42.3)                         | 6 (18.8)              |         |
| Atherosclerosis                                                |                                   |                       |         |
| None/mild                                                      | 45 (21.7)                         | 11 (35.5)             | 0.09    |
| Moderate/severe                                                | 162 (78.3)                        | 20 (64.5)             |         |
| Arteriolosclerosis                                             |                                   |                       |         |
| None/mild                                                      | 28 (15.3)                         | 3 (13.6)              | 0.84    |
| Moderate/severe                                                | 155 (84.7)                        | 19 (86.4)             |         |

|                                |            |            |       |
|--------------------------------|------------|------------|-------|
| Macroscopic cystic infarcts    |            |            |       |
| None                           | 84 (56.0)  | 19 (82.6)  | 0.02  |
| Any                            | 66 (44.0)  | 4 (17.4)   |       |
| Cortical or deep microinfarcts |            |            |       |
| 0-1                            | 135 (64.9) | 28 (87.5)  | 0.01  |
| 2+                             | 73 (35.1)  | 4 (12.5)   |       |
| Hippocampal sclerosis          |            |            |       |
| No                             | 157 (77.0) | 30 (96.8)  | 0.01  |
| Yes                            | 47 (23.0)  | 1 (3.2)    |       |
| Amyloid angiopathy             |            |            |       |
| None/mild                      | 152 (73.8) | 26 (81.3)  | 0.37  |
| Moderate/severe                | 54 (26.2)  | 6 (18.8)   |       |
| Lewy bodies in isocortex       |            |            |       |
| No                             | 184 (89.8) | 30 (96.8)  | 0.32  |
| Yes                            | 21 (10.2)  | 1 (3.2)    |       |
| Brain weight mean, gm (SD)     | 1165 (136) | 1244 (153) | 0.004 |

\*People diagnosed with dementia before death, and a CERAD score of intermediate or frequent AND a BRAAK stage of III-VI

\*\*People diagnosed with dementia before death, and a CERAD score of frequent AND a BRAAK stage of V-VI

†People with a CASI score  $\geq 86$  within 1 year of death and no dementia diagnosis, and a CERAD score of intermediate or frequent AND a BRAAK stage of III-VI

‡Percent calculated among people with non-missing neuropathology data.

Supplementary table 4. Odds of being cognitively resilient versus not (defined by intermediate or high AD pathology) adjusted for demographic characteristics and non-AD neuropathology findings; sensitivity analysis limiting cognitive resilience group to people with CASI scores  $\geq 86$  within one year before death

|                                   | Demographic-<br>adjusted* |         | Demographic and non-<br>AD neuropathology |         |
|-----------------------------------|---------------------------|---------|-------------------------------------------|---------|
|                                   | OR (95% CI)               | p-value | adjusted** OR (95% CI)                    | p-value |
| College degree                    |                           |         |                                           |         |
| No                                | 1.0                       |         | 1.0                                       |         |
| Yes                               | 1.87 (0.87-4.04)          | 0.11    | 1.74 (0.67-4.50)                          | 0.25    |
| CERAD                             |                           |         |                                           |         |
| Intermediate                      | 1.0                       |         | 1.0                                       |         |
| Frequent                          | 0.49 (0.22-1.07)          | 0.07    | 0.91 (0.32-2.60)                          | 0.87    |
| Braak                             |                           |         |                                           |         |
| III                               | 1.0                       |         | 1.0                                       |         |
| IV                                | 0.16 (0.04-0.67)          | 0.01    | 0.23 (0.04-1.19)                          | 0.08    |
| V                                 | 0.15 (0.05-0.43)          | <0.001  | 0.28 (0.08-0.98)                          | 0.047   |
| VI                                | 0.09 (0.03-0.28)          | <0.001  | 0.13 (0.03-0.50)                          | 0.003   |
| Cortical or deep<br>microinfarcts |                           |         |                                           |         |
| 0-1                               | 1.0                       |         | 1.0                                       |         |
| 2+                                | 0.28 (0.09-0.84)          | 0.02    | 0.23 (0.06-0.90)                          | 0.04    |
| Hippocampal sclerosis             |                           |         |                                           |         |
| No                                | 1.0                       |         | 1.0                                       |         |
| Yes                               | 0.13 (0.02-0.99)          | 0.049   | 0.17 (0.02-1.40)                          | 0.10    |
| Lewy bodies in isocortex          |                           |         |                                           |         |
| No                                | 1.0                       |         | 1.0                                       |         |
| Yes                               | 0.25 (0.03-2.00)          | 0.19    | 0.23 (0.02, 2.30)                         | 0.21    |
| Brain weight (per gm)             | 1.003 (1.001-1.006)       | 0.02    | 1.005 (1.001, 1.009)                      | 0.01    |

\* adjusted for age at baseline, age at death, and college degree.

\*\* adjusted for age at baseline, age at death, college degree, CERAD, Braak, microinfarcts, hippocampal sclerosis, Lewy body disease, and brain weight. Model includes 223 observations with non-missing data.

Supplementary table 5. Baseline characteristics of people with and without cognitive resilience to AD pathology; sensitivity analysis limiting to people who lived to at least age 85

|                                               | Intermediate or high AD pathology |                       |         |
|-----------------------------------------------|-----------------------------------|-----------------------|---------|
|                                               | Not resilient                     | Cognitively Resilient | p-value |
|                                               | N (%‡)                            | N (%‡)                | (chi2)  |
|                                               | N=181*                            | N=50†                 |         |
| ACT cohort:                                   |                                   |                       |         |
| Original                                      | 124 (68.5)                        | 35 (70.0)             | 0.25    |
| Expansion                                     | 43 (23.8)                         | 8 (16.0)              |         |
| Replacement                                   | 14 (7.7)                          | 7 (14.0)              |         |
| Baseline median age (IQR)                     | 78 (74-83)                        | 82 (73-85)            | 0.44    |
| Median years between baseline and death (IQR) | 13 (10-17)                        | 13 (7-16)             | 0.55    |
| Sex:                                          |                                   |                       |         |
| Male                                          | 59 (32.6)                         | 19 (38.0)             | 0.48    |
| Female                                        | 122 (67.4)                        | 31 (62.0)             |         |
| Median years of education (IQR)               | 14 (12-16)                        | 15 (12-17)            | 0.35    |
| College degree:                               |                                   |                       |         |
| No                                            | 121 (66.9)                        | 26 (52.0)             | 0.05    |
| Yes                                           | 60 (33.2)                         | 24 (48.0)             |         |
| Race:                                         |                                   |                       |         |
| Non-Hispanic white                            | 170 (93.9)                        | 45 (90.0)             | 0.33    |
| Non-white                                     | 11 (6.1)                          | 5 (10.0)              |         |
| Hypertension                                  | 60 (33.5)                         | 16 (32.7)             | 0.91    |
| Diabetes                                      | 14 (7.7)                          | 3 (6.1)               | 1.0     |
| Stroke                                        | 4 (2.2)                           | 2 (4.0)               | 0.61    |



|                                                |                  |                  |      |
|------------------------------------------------|------------------|------------------|------|
| Cerebrovascular disease                        | 14 (7.8)         | 5 (10.0)         | 0.61 |
| Coronary heart disease                         | 25 (13.9)        | 6 (12.0)         | 0.73 |
| Congestive heart failure                       | 1 (0.6)          | 1 (2.0)          | 0.38 |
| Smoking:                                       |                  |                  |      |
| Never                                          | 101 (55.8)       | 25 (50.0)        | 0.73 |
| Past                                           | 72 (39.8)        | 23 (46.0)        |      |
| Current                                        | 8 (4.4)          | 2 (4.0)          |      |
| BMI (kg/m <sup>2</sup> )                       |                  |                  |      |
| <25                                            | 75 (42.1)        | 19 (40.4)        | 0.88 |
| 25-29.9                                        | 69 (38.8)        | 20 (42.6)        |      |
| 30+                                            | 34 (19.1)        | 8 (17.0)         |      |
| Median head circumference cm (IQR)             | 56.0 (55.0-57.8) | 56.6 (55.2-58.3) |      |
| Regular exercise ( $\geq 15$ min 3x week)      | 133 (73.9)       | 39 (78.0)        | 0.55 |
| Number of difficult activities of daily living |                  |                  |      |
| 0                                              | 137 (76.1)       | 37 (74.0)        | 0.86 |
| 1                                              | 27 (15.0)        | 9 (18.0)         |      |
| 2+                                             | 16 (8.9)         | 4 (8.0)          |      |
| APOE $\epsilon 4$ allele                       | 64 (36.4)        | 18 (36.7)        | 0.96 |

\*People diagnosed with dementia before death, and a CERAD score of intermediate or frequent AND a BRAAK stage of III-VI

\*\*People diagnosed with dementia before death, and a CERAD score of frequent AND a BRAAK stage of V-VI

†People with a CASI score  $\geq 86$  within 2 years of death and no dementia diagnosis, and a CERAD score of intermediate or frequent AND a BRAAK stage of III-VI

‡Percent calculated among people with non-missing covariate data.

Supplementary table 6. Neuropathology characteristics of people with and without cognitive resilience to AD pathology; sensitivity analysis limiting to people who lived to at least age 85

|                                                                | Intermediate or high AD pathology |                       |         |
|----------------------------------------------------------------|-----------------------------------|-----------------------|---------|
|                                                                | Not resilient                     | Cognitively Resilient | p-value |
|                                                                | N (%‡)                            | N (%‡)                | (chi2)  |
|                                                                | N=181*                            | N=50†                 |         |
| Median age at death (IQR)                                      | 92 (89-96)                        | 92 (88-96)            | 0.97    |
| Median years between dementia diagnosis and death (IQR)        | 5.3 (3.3-7.6)                     |                       |         |
|                                                                |                                   | N/A                   | N/A     |
| Median years between last CASI score $\geq$ 86 and death (IQR) | N/A                               | 1.2 (0.5-1.6)         | N/A     |
| CERAD                                                          |                                   |                       |         |
| Intermediate                                                   | 66 (36.5)                         | 25 (50.0)             | 0.08    |
| Frequent                                                       | 115 (63.5)                        | 25 (50.0)             |         |
| Braak                                                          |                                   |                       |         |
| III                                                            | 16 (8.8)                          | 14 (28.0)             | <0.001  |
| IV                                                             | 25 (13.8)                         | 8 (16.0)              |         |
| V                                                              | 68 (37.6)                         | 21 (42.0)             |         |
| VI                                                             | 72 (39.8)                         | 7 (14.0)              |         |
| Atherosclerosis                                                |                                   |                       |         |
| None/mild                                                      | 35 (19.3)                         | 9 (18.4)              | 0.88    |
| Moderate/severe                                                | 146 (80.7)                        | 40 (81.6)             |         |
| Arteriolosclerosis                                             |                                   |                       |         |
| None/mild                                                      | 24 (14.8)                         | 9 (21.4)              | 0.30    |
| Moderate/severe                                                | 138 (85.2)                        | 33 (78.6)             |         |

|                                |            |            |      |
|--------------------------------|------------|------------|------|
| Macroscopic cystic infarcts    |            |            |      |
| None                           | 73 (57.0)  | 23 (71.9)  | 0.13 |
| Any                            | 55 (43.0)  | 9 (28.1)   |      |
| Cortical or deep microinfarcts |            |            |      |
| 0-1                            | 114 (63.0) | 41 (82.0)  | 0.01 |
| 2+                             | 67 (37.0)  | 9 (18.0)   |      |
| Hippocampal sclerosis          |            |            |      |
| No                             | 135 (75.4) | 45 (91.8)  | 0.01 |
| Yes                            | 44 (24.6)  | 4 (8.2)    |      |
| Amyloid angiopathy             |            |            |      |
| None/mild                      | 131 (73.2) | 35 (70.0)  | 0.66 |
| Moderate/severe                | 48 (26.8)  | 15 (30.0)  |      |
| Lewy bodies in isocortex       |            |            |      |
| No                             | 160 (89.9) | 47 (95.9)  | 0.26 |
| Yes                            | 18 (10.1)  | 2 (4.1)    |      |
| Brain weight mean, gm (SD)     | 1194 (133) | 1219 (142) | 0.01 |

\*People diagnosed with dementia before death, and a CERAD score of intermediate or frequent AND a BRAAK stage of III-VI

\*\*People diagnosed with dementia before death, and a CERAD score of frequent AND a BRAAK stage of V-VI

†People with a CASI score  $\geq 86$  within 2 years of death and no dementia diagnosis, and a CERAD score of intermediate or frequent AND a BRAAK stage of III-VI

‡Percent calculated among people with non-missing neuropathology data.
